# Supplementary material
Source: HighWire-hosted journal article supplement (https://ajnr-sso.highwirestaging.com/highwire/filestream/59945/field_highwire_adjunct_files/0/17-01108.pdf)
Supplement: 17-01108.pdf [file 17-01108.pdf]

**On-line Table 1: Routine sequences included in the MRI protocol used presently for brain tumor in our institution<sup>a</sup>**

| Parameters                                                                                      | 1.5T                                                                                | 3T                                                                                  |
|-------------------------------------------------------------------------------------------------|-------------------------------------------------------------------------------------|-------------------------------------------------------------------------------------|
| Isotropic precontrast 3D T1 turbo-field echo with reconstructions in 2 other orthogonal planes  | TR/TE, 9/4 ms; voxel size 1 × 1 × 1 mm                                              | TR/TE, 6/3 ms; voxel size 1 × 1 × 1 mm                                              |
| Axial DWI with ADC map                                                                          | TR/TE, 5500/75 ms; b-value = 0, 1000 s/mm <sup>2</sup> ; 5-mm thickness; skip, 1 mm | TR/TE, 3500/50 ms; b-value = 0, 1000 s/mm <sup>2</sup> ; 3-mm thickness; skip, 1 mm |
| FLAIR                                                                                           | TR/TE/TI, 7000/140/2300 ms; 5-mm thickness; skip, 1 mm                              | TR/TE/TI, 10,000/140/2800 ms; 3-mm thickness; skip, 1 mm                            |
| Axial TSE T2                                                                                    | TR/TE, 2700/120 ms; 5-mm thickness; skip, 1 mm                                      | TR/TE, 6700/95 ms; 3-mm thickness; skip, 1 mm                                       |
| Coronal TSE T2                                                                                  | TR/TE, 6000/120 ms; 5-mm thickness; skip, 1 mm                                      | TR/TE, 6000/75 ms; 3-mm thickness; skip, 1 mm                                       |
| Axial 2D gradient recalled-echo                                                                 | TR/TE, 1000/16 ms, 5-mm thickness; skip, 1 mm                                       | TR/TE, 1200/16 ms; 3-mm thickness; skip, 1 mm                                       |
| Isotropic postcontrast 3D T1 turbo-field echo with reconstructions in 2 other orthogonal planes | TR/TE, 9/4 ms; voxel size, 1 × 1 × 1 mm                                             | TR/TE, 6/3 ms; voxel size, 1 × 1 × 1 mm                                             |

<sup>a</sup> Both 1.5T and 3T are Achieva (Philips Healthcare, Best, the Netherlands).

**On-line Table 2: Routine sequences included in the MRI protocol used presently for spine tumor in our institution**

| Parameters                               | 1.5T                                             |
|------------------------------------------|--------------------------------------------------|
| Sagittal T2 TSE                          | TR/TE, 3000/120 ms; 3-mm thickness; skip, 0.5 mm |
| Sagittal contrast-enhanced T1            | TR/TE, 500/9 ms; 3-mm thickness; skip, 0.5 mm    |
| Axial contrast-enhanced T1               | TR/TE, 500/9 ms; 5-mm thickness; skip, 1 mm      |
| Sagittal T2 spine sequences <sup>a</sup> | TR/TE, 3000/120 ms; 3-mm thickness; skip, 0.5 mm |

<sup>a</sup> Optional.

**On-line Table 3: Locations of initial metastasis<sup>a</sup>**

| Locations          | Initial Metastasis (n = 25) |                 |                     |                      | P Value <sup>b</sup> |
|--------------------|-----------------------------|-----------------|---------------------|----------------------|----------------------|
|                    | WNT (n = 0) (%)             | SHH (n = 3) (%) | Group 3 (n = 8) (%) | Group 4 (n = 14) (%) |                      |
| Ependymal          | 0 (0)                       | 0 (0)           | 3 (37.5)            | 6 (42.9)             | .37                  |
| Lateral ventricles | 0 (0)                       | 0 (0)           | 2 (25)              | 4 (28.6)             | .57                  |
| 3rd V.I.R          | 0 (0)                       | 0 (0)           | 1 (12.5)            | 5 (35.7)             | .27                  |
| Leptomeningeal     |                             |                 |                     |                      | .01 <sup>c</sup>     |
| Supratentorial     | 0 (0)                       | 0 (0)           | 2 (25)              | 8 (57.1)             | .10                  |
| Infratentorial     | 0 (0)                       | 3 (100)         | 7 (87.5)            | 8 (54.1)             | .16                  |
| Spine              | 0 (0)                       | 0 (0)           | 7 (87.5)            | 8 (57.1)             | .02 <sup>c</sup>     |

**Note:**—3rd V.I.R indicates third ventricle infundibular recess.

<sup>a</sup> The sum of metastases in some locations is higher than total number of patients in the group because each case could have multiple metastases in >1 compartment.

<sup>b</sup> P value was determined using the Fisher exact test.

<sup>c</sup> Statistically significant.
